# Supplementary material for: Conformational Coupling between Receptor and Kinase Binding Sites through a Conserved Salt Bridge in a Signaling Complex Scaffold Protein
Source: PubMed Central journal article supplement (PMC3828127; doi:10.1371/journal.pcbi.1003337), 2013-11-14
Supplement: pcbi.1003337.s006.pdf [file pcbi.1003337.s006.pdf]

**Table S1: Circular dichroism data collected for the wild-type and R62A CheW variants.**

| [Urea] (M) | CD signal @ 220 nm |              |              |              |         |         | Average   |          |
|------------|--------------------|--------------|--------------|--------------|---------|---------|-----------|----------|
|            | Wild type #1       | Wild type #2 | Wild type #3 | Wild type #4 | R62A #1 | R62A #2 | Wild type | R62A     |
| 0          | -82.282            | -79.425      | -85.994      | -80.530      | -65.941 | -72.077 | -82.05775 | -69.009  |
| 0.05       | -82.615            | -76.993      | -85.662      | -81.388      | -66.194 | -71.781 | -81.6645  | -68.9875 |
| 0.1        | -81.743            | -78.757      | -86.330      | -80.559      | -65.507 | -71.398 | -81.84725 | -68.4525 |
| 0.15       | -81.798            | -78.064      | -85.184      | -79.750      | -65.341 | -71.468 | -81.199   | -68.4045 |
| 0.2        | -81.421            | -77.627      | -86.412      | -80.638      | -66.262 | -71.865 | -81.5245  | -69.0635 |
| 0.25       | -81.552            | -76.448      | -85.569      | -80.074      | -64.732 | -71.124 | -80.91075 | -67.928  |
| 0.3        | -81.289            | -76.885      | -84.410      | -79.517      | -65.2   | -71.425 | -80.52525 | -68.3125 |
| 0.35       | -81.595            | -76.887      | -85.999      | -80.556      | -64.813 | -71.900 | -81.25925 | -68.3565 |
| 0.4        | -81.451            | -77.086      | -84.679      | -80.230      | -64.536 | -70.077 | -80.8615  | -67.3065 |
| 0.45       | -80.910            | -76.568      | -84.745      | -79.998      | -64.749 | -71.015 | -80.55525 | -67.882  |
| 0.5        | -81.606            | -76.124      | -83.690      | -79.767      | -64.582 | -70.941 | -80.29675 | -67.7615 |
| 0.55       | -80.829            | -76.078      | -85.307      | -80.546      | -65.227 | -70.917 | -80.69    | -68.072  |
| 0.6        | -80.477            | -75.259      | -83.138      | -78.425      | -64.077 | -70.095 | -79.32475 | -67.086  |
| 0.65       | -80.395            | -75.193      | -83.420      | -79.227      | -64.79  | -70.652 | -79.55875 | -67.721  |
| 0.7        | -81.142            | -74.579      | -83.526      | -79.529      | -63.211 | -69.231 | -79.694   | -66.221  |
| 0.75       | -81.277            | -75.070      | -82.627      | -78.108      | -62.941 | -69.548 | -79.2705  | -66.2445 |
| 0.8        | -80.578            | -74.392      | -82.464      | -78.335      | -64.554 | -70.948 | -78.94225 | -67.751  |
| 0.85       | -80.335            | -74.098      | -81.487      | -79.991      | -63.927 | -70.165 | -78.97775 | -67.046  |
| 0.9        | -81.338            | -74.238      | -81.958      | -78.634      | -63.425 | -69.370 | -79.042   | -66.3975 |
| 0.95       | -80.267            | -75.299      | -82.390      | -78.667      | -63.037 | -70.057 | -79.15575 | -66.547  |
| 1          | -80.145            | -74.614      | -82.478      | -79.477      | -62.915 | -69.166 | -79.1785  | -66.0405 |
| 1.05       | -80.597            | -74.129      | -81.832      | -78.246      | -64.124 | -69.532 | -78.701   | -66.828  |
| 1.1        | -80.517            | -75.051      | -81.666      | -77.454      | -63.24  | -69.655 | -78.672   | -66.4475 |
| 1.15       | -79.661            | -74.008      | -81.939      | -77.420      | -63.093 | -68.420 | -78.257   | -65.7565 |
| 1.2        | -79.476            | -74.885      | -81.073      | -76.286      | -62.377 | -68.223 | -77.93    | -65.3    |
| 1.25       | -79.547            | -74.091      | -80.539      | -77.887      | -62.741 | -68.802 | -78.016   | -65.7715 |
| 1.3        | -79.669            | -73.044      | -80.941      | -77.640      | -63.227 | -67.684 | -77.8235  | -65.4555 |
| 1.35       | -78.864            | -75.030      | -79.512      | -78.358      | -62.417 | -68.709 | -77.941   | -65.563  |
| 1.4        | -80.985            | -73.505      | -81.908      | -76.526      | -62.948 | -67.331 | -78.231   | -65.1395 |
| 1.45       | -78.503            | -74.120      | -79.948      | -75.845      | -62.502 | -67.813 | -77.104   | -65.1575 |
| 1.5        | -79.397            | -74.428      | -79.739      | -75.577      | -62.283 | -68.426 | -77.28525 | -65.3545 |
| 1.55       | -79.526            | -73.852      | -79.670      | -76.422      | -62.154 | -67.318 | -77.3675  | -64.736  |
| 1.6        | -78.511            | -74.083      | -79.426      | -76.558      | -62.709 | -68.459 | -77.1445  | -65.584  |
| 1.65       | -78.682            | -73.624      | -80.193      | -77.000      | -62.648 | -67.958 | -77.37475 | -65.303  |
| 1.7        | -78.403            | -73.465      | -79.862      | -77.005      | -61.604 | -68.433 | -77.18375 | -65.0185 |
| 1.75       | -78.813            | -73.494      | -79.085      | -77.034      | -61.607 | -67.897 | -77.1065  | -64.752  |
| 1.8        | -78.756            | -73.625      | -79.240      | -75.282      | -61.713 | -67.049 | -76.72575 | -64.381  |
| 1.85       | -78.352            | -74.128      | -79.152      | -76.187      | -60.663 | -67.816 | -76.95475 | -64.2395 |
| 1.9        | -78.672            | -73.207      | -78.647      | -76.066      | -61.169 | -65.620 | -76.648   | -63.3945 |
| 1.95       | -77.830            | -72.859      | -79.335      | -76.565      | -61.835 | -65.947 | -76.64725 | -63.891  |
| 2          | -77.487            | -72.156      | -78.749      | -75.373      | -60.493 | -66.270 | -75.94125 | -63.3815 |
| 2.05       | -77.555            | -72.994      | -78.318      | -75.575      | -60.852 | -66.267 | -76.1105  | -63.5595 |
| 2.1        | -77.516            | -71.967      | -78.043      | -76.095      | -59.644 | -66.404 | -75.90525 | -63.024  |
| 2.15       | -78.058            | -73.340      | -79.059      | -76.792      | -60.242 | -66.146 | -76.81225 | -63.194  |
| 2.2        | -78.291            | -72.613      | -79.443      | -75.138      | -60.4   | -65.488 | -76.37125 | -62.944  |
| 2.25       | -77.255            | -72.076      | -79.724      | -75.309      | -60.426 | -65.938 | -76.091   | -63.182  |

|      |         |         |         |         |         |         |           |          |
|------|---------|---------|---------|---------|---------|---------|-----------|----------|
| 2.3  | -78.145 | -72.407 | -78.067 | -75.115 | -60.07  | -64.900 | -75.9335  | -62.485  |
| 2.35 | -77.126 | -72.161 | -78.355 | -75.919 | -60.155 | -65.080 | -75.89025 | -62.6175 |
| 2.4  | -77.188 | -72.876 | -77.264 | -73.860 | -60.5   | -64.987 | -75.297   | -62.7435 |
| 2.45 | -77.459 | -71.515 | -76.982 | -75.599 | -59.581 | -66.280 | -75.38875 | -62.9305 |
| 2.5  | -77.399 | -72.601 | -76.663 | -74.827 | -60.478 | -64.152 | -75.3725  | -62.315  |
| 2.55 | -77.439 | -72.492 | -78.329 | -74.518 | -59.769 | -64.803 | -75.6945  | -62.286  |
| 2.6  | -77.350 | -73.215 | -77.909 | -74.552 | -59.812 | -64.261 | -75.7565  | -62.0365 |
| 2.65 | -77.108 | -72.406 | -77.119 | -74.364 | -60.092 | -63.658 | -75.24925 | -61.875  |
| 2.7  | -76.817 | -72.200 | -77.931 | -73.830 | -59.713 | -63.215 | -75.1945  | -61.464  |
| 2.75 | -76.451 | -73.012 | -76.751 | -74.750 | -59.435 | -63.427 | -75.241   | -61.431  |
| 2.8  | -76.537 | -72.987 | -78.197 | -73.778 | -58.581 | -63.525 | -75.37475 | -61.053  |
| 2.85 | -77.382 | -72.947 | -77.666 | -74.927 | -59.109 | -64.293 | -75.7305  | -61.701  |
| 2.9  | -75.745 | -72.136 | -75.889 | -77.071 | -59.048 | -64.350 | -75.21025 | -61.699  |
| 2.95 | -76.428 | -72.381 | -76.015 | -73.729 | -59.605 | -62.731 | -74.63825 | -61.168  |
| 3    | -76.170 | -71.626 | -77.255 | -73.835 | -58.305 | -64.250 | -74.7215  | -61.2775 |
| 3.05 | -75.907 | -71.759 | -75.873 | -73.573 | -58.249 | -62.925 | -74.278   | -60.587  |
| 3.1  | -76.069 | -72.911 | -76.212 | -73.981 | -59.237 | -63.998 | -74.79325 | -61.6175 |
| 3.15 | -76.579 | -71.834 | -76.219 | -74.013 | -57.124 | -62.624 | -74.66125 | -59.874  |
| 3.2  | -75.845 | -71.589 | -75.661 | -73.522 | -57.658 | -62.206 | -74.15425 | -59.932  |
| 3.25 | -76.138 | -70.623 | -75.317 | -72.267 | -57.22  | -61.728 | -73.58625 | -59.474  |
| 3.3  | -74.489 | -69.986 | -76.655 | -73.490 | -57.836 | -62.018 | -73.655   | -59.927  |
| 3.35 | -76.575 | -70.161 | -76.375 | -72.333 | -57.121 | -61.145 | -73.861   | -59.133  |
| 3.4  | -76.651 | -70.508 | -76.977 | -74.579 | -58.573 | -61.178 | -74.67875 | -59.8755 |
| 3.45 | -75.669 | -70.250 | -74.970 | -74.870 | -57.521 | -61.131 | -73.93975 | -59.326  |
| 3.5  | -75.213 | -70.986 | -74.236 | -73.001 | -57.068 | -60.275 | -73.359   | -58.6715 |
| 3.55 | -74.943 | -69.916 | -75.762 | -74.770 | -57.753 | -60.840 | -73.84775 | -59.2965 |
| 3.6  | -75.416 | -70.683 | -74.643 | -73.511 | -57.738 | -61.083 | -73.56325 | -59.4105 |
| 3.65 | -74.818 | -70.999 | -73.760 | -72.974 | -55.613 | -61.247 | -73.13775 | -58.43   |
| 3.7  | -75.049 | -70.365 | -73.914 | -73.132 | -55.202 | -59.915 | -73.115   | -57.5585 |
| 3.75 | -73.526 | -70.614 | -74.502 | -70.515 | -56.234 | -59.053 | -72.28925 | -57.6435 |
| 3.8  | -74.262 | -71.238 | -74.391 | -73.713 | -56.465 | -59.452 | -73.401   | -57.9585 |
| 3.85 | -73.417 | -70.233 | -74.366 | -72.440 | -55.574 | -60.249 | -72.614   | -57.9115 |
| 3.9  | -73.899 | -69.204 | -73.823 | -72.167 | -55.838 | -59.243 | -72.27325 | -57.5405 |
| 3.95 | -72.249 | -69.885 | -73.552 | -71.197 | -55.389 | -58.830 | -71.72075 | -57.1095 |
| 4    | -73.913 | -69.812 | -73.955 | -70.936 | -54.603 | -58.383 | -72.154   | -56.493  |
| 4.05 | -72.813 | -68.743 | -73.152 | -72.514 | -55.744 | -59.324 | -71.8055  | -57.534  |
| 4.1  | -72.741 | -69.841 | -70.423 | -72.440 | -55.948 | -57.670 | -71.36125 | -56.809  |
| 4.15 | -71.885 | -69.405 | -71.789 | -71.634 | -53.936 | -57.519 | -71.17825 | -55.7275 |
| 4.2  | -72.893 | -70.249 | -72.223 | -71.277 | -54.478 | -58.808 | -71.6605  | -56.643  |
| 4.25 | -73.190 | -68.712 | -71.934 | -71.142 | -53.314 | -58.384 | -71.2445  | -55.849  |
| 4.3  | -70.928 | -68.788 | -71.643 | -71.597 | -53.825 | -58.400 | -70.739   | -56.1125 |
| 4.35 | -70.820 | -69.512 | -72.037 | -69.669 | -53.825 | -56.896 | -70.5095  | -55.3605 |
| 4.4  | -70.839 | -69.151 | -71.805 | -70.509 | -53.28  | -55.781 | -70.576   | -54.5305 |
| 4.45 | -71.245 | -69.707 | -71.294 | -70.145 | -53.499 | -55.914 | -70.59775 | -54.7065 |
| 4.5  | -71.018 | -69.458 | -70.279 | -68.787 | -52.173 | -56.861 | -69.8855  | -54.517  |
| 4.55 | -70.968 | -68.018 | -69.596 | -69.667 | -51.981 | -55.024 | -69.56225 | -53.5025 |
| 4.6  | -70.796 | -68.357 | -70.567 | -68.991 | -51.506 | -56.542 | -69.67775 | -54.024  |
| 4.65 | -69.206 | -66.965 | -70.823 | -69.167 | -50.471 | -54.822 | -69.04025 | -52.6465 |
| 4.7  | -68.314 | -67.727 | -68.183 | -69.221 | -50.916 | -55.691 | -68.36125 | -53.3035 |
| 4.75 | -66.701 | -68.078 | -70.372 | -67.675 | -52.12  | -53.271 | -68.2065  | -52.6955 |

|      |         |         |         |         |         |         |           |          |
|------|---------|---------|---------|---------|---------|---------|-----------|----------|
| 4.8  | -69.039 | -69.639 | -68.067 | -66.613 | -50.941 | -54.036 | -68.3395  | -52.4885 |
| 4.85 | -67.403 | -67.201 | -68.134 | -68.305 | -49.587 | -52.636 | -67.76075 | -51.1115 |
| 4.9  | -66.849 | -66.063 | -68.582 | -67.053 | -49.082 | -53.653 | -67.13675 | -51.3675 |
| 4.95 | -64.652 | -65.756 | -68.134 | -66.688 | -48.691 | -51.947 | -66.3075  | -50.319  |
| 5    | -67.542 | -65.000 | -65.994 | -64.231 | -48.689 | -51.662 | -65.69175 | -50.1755 |
| 5.05 | -66.146 | -65.549 | -66.256 | -66.337 | -47.967 | -51.371 | -66.072   | -49.669  |
| 5.1  | -64.489 | -64.596 | -65.248 | -65.860 | -46.923 | -49.722 | -65.04825 | -48.3225 |
| 5.15 | -63.861 | -64.529 | -65.542 | -64.992 | -46.771 | -47.978 | -64.731   | -47.3745 |
| 5.2  | -64.738 | -63.118 | -64.914 | -63.435 | -46.339 | -49.050 | -64.05125 | -47.6945 |
| 5.25 | -62.852 | -64.504 | -63.439 | -63.453 | -46.539 | -47.811 | -63.562   | -47.175  |
| 5.3  | -61.173 | -62.196 | -63.747 | -61.040 | -45.163 | -47.830 | -62.039   | -46.4965 |
| 5.35 | -61.723 | -62.321 | -61.189 | -61.412 | -44.557 | -45.731 | -61.66125 | -45.144  |
| 5.4  | -60.269 | -61.727 | -61.974 | -62.545 | -43.703 | -44.921 | -61.62875 | -44.312  |
| 5.45 | -59.497 | -60.223 | -60.021 | -59.872 | -40.665 | -43.374 | -59.90325 | -42.0195 |
| 5.5  | -58.243 | -59.438 | -59.560 | -61.134 | -41.566 | -43.389 | -59.59375 | -42.4775 |
| 5.55 | -56.517 | -58.778 | -60.404 | -60.086 | -40.126 | -43.006 | -58.94625 | -41.566  |
| 5.6  | -56.034 | -58.218 | -58.209 | -57.467 | -40.618 | -43.405 | -57.482   | -42.0115 |
| 5.65 | -56.133 | -56.977 | -56.262 | -57.618 | -41.524 | -43.278 | -56.7475  | -42.401  |
| 5.7  | -54.619 | -56.695 | -55.374 | -58.184 | -38.478 | -39.279 | -56.218   | -38.8785 |
| 5.75 | -53.344 | -54.439 | -54.785 | -56.080 | -36.314 | -38.594 | -54.662   | -37.454  |
| 5.8  | -51.886 | -53.999 | -52.900 | -54.821 | -36.605 | -39.854 | -53.4015  | -38.2295 |
| 5.85 | -50.437 | -53.167 | -50.403 | -55.359 | -34.671 | -36.296 | -52.3415  | -35.4835 |
| 5.9  | -48.094 | -51.882 | -51.130 | -53.031 | -33.307 | -36.415 | -51.03425 | -34.861  |
| 5.95 | -48.708 | -50.678 | -50.975 | -52.314 | -33.143 | -35.856 | -50.66875 | -34.4995 |
| 6    | -46.711 | -49.793 | -48.487 | -50.051 | -33.971 | -36.033 | -48.7605  | -35.002  |
| 6.05 | -48.063 | -50.100 | -46.628 | -49.643 | -32.821 | -34.393 | -48.6085  | -33.607  |
| 6.1  | -45.867 | -47.386 | -46.974 | -49.171 | -32.298 | -34.397 | -47.3495  | -33.3475 |
| 6.15 | -43.484 | -46.123 | -46.567 | -48.844 | -29.354 | -33.569 | -46.2545  | -31.4615 |
| 6.2  | -43.624 | -46.372 | -43.396 | -46.185 | -31.548 | -33.111 | -44.89425 | -32.3295 |
| 6.25 | -42.850 | -45.200 | -44.908 | -46.455 | -29.825 | -31.756 | -44.85325 | -30.7905 |
| 6.3  | -41.817 | -43.331 | -41.980 | -43.881 | -28.07  | -30.733 | -42.75225 | -29.4015 |
| 6.35 | -40.318 | -44.182 | -41.777 | -43.369 | -29.086 | -31.985 | -42.4115  | -30.5355 |
| 6.4  | -39.221 | -41.422 | -41.128 | -41.492 | -27.332 | -28.464 | -40.81575 | -27.898  |
| 6.45 | -39.010 | -39.640 | -40.733 | -44.017 | -28.382 | -29.435 | -40.85    | -28.9085 |
| 6.5  | -39.148 | -39.346 | -36.695 | -42.410 | -26.944 | -29.039 | -39.39975 | -27.9915 |
| 6.55 | -38.527 | -38.245 | -38.405 | -40.168 | -26.453 | -28.849 | -38.83625 | -27.651  |
| 6.6  | -36.718 | -39.851 | -36.479 | -38.653 | -24.908 | -28.128 | -37.92525 | -26.518  |
| 6.65 | -36.200 | -37.264 | -35.301 | -41.182 | -25.981 | -27.079 | -37.48675 | -26.53   |
| 6.7  | -35.189 | -37.250 | -36.508 | -38.456 | -25.674 | -27.907 | -36.85075 | -26.7905 |
| 6.75 | -34.382 | -34.189 | -35.316 | -37.256 | -25.463 | -27.349 | -35.28575 | -26.406  |
| 6.8  | -33.305 | -34.626 | -33.763 | -33.631 | -25.028 | -25.997 | -33.83125 | -25.5125 |
| 6.85 | -34.688 | -34.177 | -33.355 | -35.676 | -24.477 | -25.772 | -34.474   | -25.1245 |
| 6.9  | -30.289 | -33.377 | -33.863 | -37.151 | -25.749 | -25.543 | -33.67    | -25.646  |
| 6.95 | -31.105 | -34.679 | -32.283 | -36.071 | -25.021 | -23.518 | -33.5345  | -24.2695 |
| 7    | -32.434 | -33.737 | -29.132 | -33.027 | -22.919 | -23.993 | -32.0825  | -23.456  |
| 7.05 | -30.100 | -32.684 | -30.563 | -32.401 | -24.807 | -24.512 | -31.437   | -24.6595 |
| 7.1  | -34.241 | -31.210 | -31.586 | -33.127 | -23.434 | -25.878 | -32.541   | -24.656  |
| 7.15 | -31.694 | -32.036 | -31.532 | -33.322 | -24.136 | -22.234 | -32.146   | -23.185  |
| 7.2  | -31.874 | -30.632 | -30.145 | -30.857 | -24.377 | -25.765 | -30.877   | -25.071  |
| 7.25 | -32.514 | -29.876 | -31.869 | -31.030 | -22.643 | -23.102 | -31.32225 | -22.8725 |

|      |         |         |         |         |         |         |           |          |
|------|---------|---------|---------|---------|---------|---------|-----------|----------|
| 7.3  | -29.753 | -30.655 | -29.025 | -32.090 | -23.199 | -24.838 | -30.38075 | -24.0185 |
| 7.35 | -28.624 | -29.034 | -29.172 | -28.955 | -22.878 | -25.586 | -28.94625 | -24.232  |
| 7.4  | -27.036 | -28.301 | -28.008 | -27.733 | -22.333 | -23.162 | -27.7695  | -22.7475 |
| 7.45 | -29.064 | -29.968 | -29.707 | -31.511 | -22.644 | -24.445 | -30.0625  | -23.5445 |
| 7.5  | -28.950 | -29.150 | -27.203 | -30.459 | -21.496 | -22.593 | -28.9405  | -22.0445 |
| 7.55 | -27.270 | -28.542 | -27.488 | -29.544 | -23.315 | -20.960 | -28.211   | -22.1375 |
| 7.6  | -29.121 | -25.764 | -27.458 | -29.850 | -20.705 | -23.311 | -28.04825 | -22.008  |
| 7.65 | -30.420 | -26.463 | -29.269 | -28.320 | -24.419 | -22.151 | -28.618   | -23.285  |
| 7.7  | -27.992 | -26.565 | -25.993 | -30.235 | -23.257 | -23.387 | -27.69625 | -23.322  |
| 7.75 | -31.716 | -28.392 | -26.900 | -26.773 | -21.258 | -20.217 | -28.44525 | -20.7375 |
| 7.8  | -27.089 | -26.498 | -26.873 | -29.341 | -22.528 | -24.048 | -27.45025 | -23.288  |
| 7.85 | -27.954 | -27.030 | -27.739 | -28.199 | -22.386 | -20.442 | -27.7305  | -21.414  |
| 7.9  | -27.834 | -27.780 | -26.429 | -27.132 | -23.176 | -22.647 | -27.29375 | -22.9115 |
| 7.95 | -26.591 | -28.181 | -26.054 | -25.418 | -22.828 | -22.758 | -26.561   | -22.793  |
| 8    | -25.331 | -26.462 | -27.475 | -25.250 | -24.764 | -22.586 | -26.1295  | -23.675  |
| 8.05 | -26.181 | -24.839 | -26.501 | -26.179 | -22.341 | -21.424 | -25.925   | -21.8825 |
| 8.1  | -27.730 | -26.601 | -24.419 | -26.250 | -22.871 | -21.659 | -26.25    | -22.265  |
| 8.15 | -26.550 | -26.432 | -25.099 | -26.885 | -21.388 | -21.982 | -26.2415  | -21.685  |
| 8.2  | -28.247 | -26.232 | -25.562 | -27.120 | -22.215 | -21.427 | -26.79025 | -21.821  |
| 8.25 | -25.294 | -26.514 | -25.771 | -24.694 | -21.201 | -22.017 | -25.56825 | -21.609  |
| 8.3  | -26.743 | -27.725 | -26.439 | -26.619 | -20.859 | -19.638 | -26.8815  | -20.2485 |
| 8.35 | -26.863 | -25.754 | -25.006 | -26.184 | -21.477 | -20.433 | -25.95175 | -20.955  |
| 8.4  | -25.257 | -27.765 | -24.868 | -25.126 | -22.66  | -20.305 | -25.754   | -21.4825 |
| 8.45 | -26.117 | -27.304 | -23.960 | -25.156 | -22.678 | -23.188 | -25.63425 | -22.933  |
| 8.5  | -25.023 | -27.893 | -23.574 | -25.548 | -21.588 | -19.633 | -25.5095  | -20.6105 |
| 8.55 | -25.847 | -24.634 | -26.068 | -26.112 | -20.995 | -22.951 | -25.66525 | -21.973  |
| 8.6  | -26.140 | -25.311 | -24.498 | -24.913 | -20.763 | -21.162 | -25.2155  | -20.9625 |
| 8.65 | -26.413 | -25.180 | -22.997 | -25.707 | -18.882 | -20.834 | -25.07425 | -19.858  |
| 8.7  | -25.003 | -25.457 | -24.275 | -24.035 | -20.723 | -20.413 | -24.6925  | -20.568  |
| 8.75 | -25.574 | -23.519 | -22.193 | -24.701 | -20.537 | -19.721 | -23.99675 | -20.129  |
| 8.8  | -25.619 | -25.972 | -23.717 | -21.861 | -19.284 | -21.535 | -24.29225 | -20.4095 |
| 8.85 | -24.986 | -23.302 | -22.555 | -24.861 | -22.093 | -22.238 | -23.926   | -22.1655 |
| 8.9  | -26.364 | -23.662 | -22.504 | -24.706 | -18.672 | -20.090 | -24.309   | -19.381  |
| 8.95 | -24.605 | -26.266 | -25.051 | -25.568 | -22.133 | -17.568 | -25.3725  | -19.8505 |
| 9    | -24.430 | -23.431 | -24.347 | -25.266 | -19.904 | -18.638 | -24.3685  | -19.271  |
| 9.05 | -24.065 | -24.876 | -24.172 | -21.113 | -18.46  | -17.544 | -23.5565  | -18.002  |
| 9.1  | -23.732 | -24.623 | -23.842 | -25.308 | -19.952 | -21.108 | -24.37625 | -20.53   |
| 9.15 | -27.590 | -23.315 | -24.651 | -24.509 | -20.619 | -21.148 | -25.01625 | -20.8835 |
| 9.2  | -25.431 | -22.982 | -23.384 | -23.128 | -18.767 | -17.316 | -23.73125 | -18.0415 |
| 9.25 | -22.017 | -24.819 | -21.786 | -23.565 | -18.396 | -19.002 | -23.04675 | -18.699  |
| 9.3  | -24.941 | -23.659 | -24.352 | -22.800 | -18.664 | -15.939 | -23.938   | -17.3015 |
