# Supplementary material for: Conformational Coupling between Receptor and Kinase Binding Sites through a Conserved Salt Bridge in a Signaling Complex Scaffold Protein
Source: PubMed Central journal article supplement (PMC3828127; doi:10.1371/journal.pcbi.1003337), 2013-11-14
Supplement: pcbi.1003337.s007.pdf [file pcbi.1003337.s007.pdf]

**Table S2: Top 5 most conserved residues in F1 and F7 classes of the CheW protein.**

| F1                   |              | F7                   |              |
|----------------------|--------------|----------------------|--------------|
| Residue <sup>1</sup> | Identity (%) | Residue <sup>1</sup> | Identity (%) |
| Gly57                | 100.0        | Gly57                | 99.8         |
| Pro49 <sup>2</sup>   | 98.7         | <b>Arg62</b>         | 99.8         |
| Val102               | 97.1         | <b>Glu38</b>         | 99.3         |
| Gly63                | 94.0         | Gly63                | 99.1         |
| Phe22                | 93.8         | Gly99                | 99.1         |

<sup>1</sup>Residue numbers are given in reference to the *E. coli* CheW protein.

<sup>2</sup>Position 49 is alanine in *E. coli* CheW but it is 98.7% conserved as proline in class F1.
