# Supplementary material for: Conformational Coupling between Receptor and Kinase Binding Sites through a Conserved Salt Bridge in a Signaling Complex Scaffold Protein
Source: PubMed Central journal article supplement (PMC3828127; doi:10.1371/journal.pcbi.1003337), 2013-11-14
Supplement: pcbi.1003337.s008.pdf [file pcbi.1003337.s008.pdf]

**Table S3:  $^{15}\text{N}$  HSQC Chemical Shift assignment in 30C° for the wild-type, R62A and E38A alleles. Buffer: 30 mM Tris-HCl (pH 7.3), 30 mM NaCl, 0.2% sodium azide in 90% H<sub>2</sub>O and 10% D<sub>2</sub>O.**

| Residues | Wild type |         | E38A    |         | R62A    |         |
|----------|-----------|---------|---------|---------|---------|---------|
|          | H (ppm)   | N (ppm) | H (ppm) | N (ppm) | H (ppm) | N (ppm) |
| Thr8     | 8.202     | 118.42  | 8.213   | 118.41  | 8.213   | 118.4   |
| Lys9     | 8.246     | 124.39  | -       | -       | 8.256   | 124.37  |
| Leu10    | 8.307     | 124.2   | 8.317   | 124.19  | 8.313   | 124.14  |
| Ala11    | 8.309     | 124.81  | 8.321   | 124.82  | 8.32    | 124.8   |
| Ser12    | 8.098     | 114.28  | 8.106   | 114.26  | 8.108   | 114.29  |
| Glu13    | 8.241     | 123.53  | 8.253   | 123.57  | 8.253   | 123.52  |
| Pro14    |           | -       |         | -       |         | -       |
| Ser15    | 8.466     | 116.29  | 8.471   | 116.31  | 8.48    | 116.29  |
| Gly16    | 8.227     | 110.44  | 8.244   | 110.44  | 8.237   | 110.45  |
| Gln17    | 8.374     | 120.55  | -       | -       | 8.378   | 120.56  |
| Glu18    | 8.01      | 121.67  | -       | -       | 8.016   | 121.68  |
| Phe19    | 9.232     | 120.81  | 9.255   | 120.86  | 9.243   | 120.83  |
| Leu20    | 9.188     | 124.08  | 9.21    | 124.22  | -       | -       |
| Val21    | 8.497     | 128.28  | 8.501   | 128.3   | 8.515   | 128.27  |
| Phe22    | 9.344     | 123.81  | 9.32    | 123.76  | 9.35    | 123.8   |
| Thr23    | 8.739     | 112.05  | 8.702   | 112.22  | 8.742   | 112.14  |
| Leu24    | 8.301     | 124.01  | 8.32    | 123.97  | 8.317   | 124.16  |
| Gly25    | 9.852     | 117.56  | 9.809   | 117.47  | 9.849   | 117.55  |
| Asp26    | 8.718     | 124.75  | -       | -       | 8.738   | 124.83  |
| Glu27    | 7.843     | 119.56  | -       | -       | 7.857   | 119.6   |
| Glu28    | 7.954     | 118.41  | 7.974   | 118.5   | 7.977   | 118.45  |
| Tyr29    | 9.006     | 121.93  | 8.996   | 121.89  | 9.011   | 121.91  |

|        |       |        |       |        |       |        |
|--------|-------|--------|-------|--------|-------|--------|
| Gly30  | 8.622 | 128.53 | -     | -      | -     | -      |
| Ile31  | 9.003 | 118.46 | 9.006 | 118.8  | 9.008 | 118.42 |
| Asp32  | 8.801 | 126.6  | 8.795 | 126.83 | 8.808 | 126.54 |
| Ile33  | 7.951 | 127.64 | 7.994 | 127.77 | 7.95  | 127.62 |
| Leu34  | 8.569 | 122.17 | -     | -      | 8.575 | 122.15 |
| Lys35  | 7.786 | 115.29 | 7.801 | 115.33 | 7.78  | 115.26 |
| Val36  | 7.575 | 120.05 | 7.568 | 120.13 | 7.579 | 120.03 |
| Gln37  | 9.52  | 128.61 | -     | -      | 9.511 | 128.81 |
| Glu38* | 7.669 | 112.67 | -     | -      | 7.66  | 112.96 |
| Ile39  | 8.564 | 122.36 | -     | -      | 8.549 | 122.38 |
| Arg40  | 9.454 | 126.49 | -     | -      | 9.42  | 126.26 |
| Gly41  | 8.243 | 107.49 | 8.47  | 107.66 | 8.337 | 107.37 |
| Tyr42  | 8.444 | 121    | -     | -      | 8.42  | 121.31 |
| Asp43  | 7.533 | 125.96 | -     | -      | -     | -      |
| Gln44  | 8.14  | 117.19 | -     | -      | 8.143 | 117.24 |
| Val45  | 7.946 | 123.17 | -     | -      | -     | -      |
| Thr46  | 9.037 | 124.29 | -     | -      | -     | -      |
| Arg47  | 8.616 | 127.83 | -     | -      | -     | -      |
| Ile48  | 8.408 | 124.66 | -     | -      | 8.421 | 124.52 |
| Ala49  | 8.633 | 129.71 | -     | -      | 8.621 | 129.39 |
| Asn50  | 8.667 | 113.13 | -     | -      | 8.672 | 113.33 |
| Thr51  | 7.475 | 107.32 | -     | -      | 7.507 | 107.72 |
| Pro52  |       | -      |       | -      |       | -      |
| Ala53  | 8.076 | 122.81 | -     | -      | 8.088 | 122.84 |
| Phe54  | 7.086 | 107.42 | -     | -      | -     | -      |
| Ile55  | 7.441 | 123.21 | -     | -      | -     | -      |

|        |       |        |       |        |       |        |
|--------|-------|--------|-------|--------|-------|--------|
| Lys56  | 8.645 | 125.88 | -     | -      | 8.645 | 125.76 |
| Gly57  | 7.153 | 127.42 | -     | -      | -     | -      |
| Val58  | 8.614 | 112.56 | -     | -      | -     | -      |
| Thr59  | 8.549 | 116.41 | -     | -      | 8.568 | 116.27 |
| Asn60  | 8.123 | 124.14 | -     | -      | -     | -      |
| Leu61  | 9.175 | 128.58 | -     | -      | -     | -      |
| Arg62* | 9.086 | 123.15 | -     | -      | -     | -      |
| Gly63  | 8.012 | 130.08 | -     | -      | -     | -      |
| Val64  | 7.536 | 122.62 | -     | -      | -     | -      |
| Ile65  | 8.491 | 127.23 | 8.49  | 127.31 | 8.472 | 127.32 |
| Val66  | 8.947 | 130.7  | -     | -      | 8.912 | 130.44 |
| Pro67  |       | -      |       | -      |       | -      |
| Ile68  | -     | -      | -     | -      | -     | -      |
| Val69  | 9.202 | 126.71 | -     | -      | -     | -      |
| Asp70  | 9.765 | 126.48 | -     | -      | 9.69  | 126.36 |
| Leu71  | -     | -      | -     | -      | -     | -      |
| Arg72  | 8.496 | 117.5  | 8.486 | 117.53 | 8.491 | 117.42 |
| Ile73  | 6.888 | 116.02 | -     | -      | 6.98  | 116.4  |
| Lys74  | -     | -      | -     | -      | -     | -      |
| Phe75  | 7.631 | 113.25 | -     | -      | 7.633 | 113.48 |
| Ser76  | 7.781 | 112.87 | -     | -      | 7.824 | 112.96 |
| Gln77  | 8.354 | 119.22 | 8.325 | 119.13 | 8.369 | 119.31 |
| Val78  | 7.716 | 117.53 | 7.752 | 117.56 | 7.764 | 117.78 |
| Asp79  | 8.148 | 121.64 | -     | -      | 8.159 | 121.68 |
| Val80  | -     | -      | -     | -      | -     | -      |
| Asp81  | 7.956 | 122.94 | -     | -      | -     | -      |

|        |       |        |       |        |       |        |
|--------|-------|--------|-------|--------|-------|--------|
| Tyr82  | 8.154 | 120.2  | -     | -      | 8.158 | 120.43 |
| Asn83  | 9.14  | 121.24 | 9.065 | 120.88 | 9.109 | 121.15 |
| Asp84  | -     | -      | -     | -      | -     | -      |
| Asn85  | 8.692 | 116.3  | 8.692 | 116.47 | 8.694 | 116.41 |
| Thr86  | 7.67  | 118.83 | 7.65  | 118.08 | 7.669 | 118.42 |
| Val87  | -     | -      | -     | -      | -     | -      |
| Val88  | 8.679 | 122.76 | -     | -      | 8.762 | 122.19 |
| Ile89  | 9.005 | 126.16 | -     | -      | 9.02  | 126.17 |
| Val90  | 9.131 | 128.44 | -     | -      | -     | -      |
| Leu91  | 9.511 | 129.28 | 9.48  | 129.15 | 9.491 | 129.33 |
| Asn92  | 8.672 | 118.69 | 8.671 | 118.56 | 8.691 | 118.74 |
| Leu93  | -     | -      | -     | -      | -     | -      |
| Gly94  | 8.661 | 112.77 | -     | -      | 8.656 | 112.6  |
| Gln95  | 8.555 | 121.45 | 8.576 | 121.4  | 8.557 | 121.5  |
| Arg96  | 7.472 | 117.09 | 7.56  | 117.4  | 7.446 | 116.9  |
| Val97  | 7.991 | 122.72 | -     | -      | 8.018 | 122.57 |
| Val98  | 8.516 | 122.88 | -     | -      | 8.535 | 122.88 |
| Gly99  | 9.141 | 113.01 | 9.099 | 112.77 | 9.115 | 112.83 |
| Ile100 | 8.996 | 116.78 | 8.981 | 116.86 | -     | -      |
| Val101 | 8.778 | 123.82 | -     | -      | 8.706 | 123.69 |
| Val102 | 8.293 | 116.55 | -     | -      | -     | -      |
| Asp103 | 7.968 | 117.08 | 7.976 | 117.24 | 7.963 | 117.13 |
| Gly104 | 7.424 | 129.57 | -     | -      | 7.418 | 104.39 |
| Val105 | 8.591 | 117.19 | -     | -      | 8.585 | 117.18 |
| Ser106 | 8.875 | 120.54 | 8.895 | 120.56 | 8.884 | 120.5  |
| Asp107 | 8.108 | 120.2  | -     | -      | 8.107 | 120.17 |

|        |       |        |       |        |       |        |
|--------|-------|--------|-------|--------|-------|--------|
| Val108 | 8.074 | 117.92 | 8.103 | 117.95 | 8.088 | 117.94 |
| Leu109 | 8.973 | 126.74 | 8.982 | 126.75 | 8.979 | 126.7  |
| Ser110 | 8.376 | 116.72 | 8.397 | 116.81 | 8.387 | 116.71 |
| Leu111 | 8.772 | 124.89 | 8.771 | 124.83 | 8.776 | 124.86 |
| Thr112 | 8.735 | 113.54 | 8.747 | 113.55 | 8.744 | 113.55 |
| Ala113 | 8.664 | 121.96 | 8.675 | 121.98 | 8.675 | 121.97 |
| Glu114 | 8.323 | 114.23 | 8.337 | 114.27 | 8.337 | 114.25 |
| Gln115 | 7.793 | 117.97 | 7.798 | 117.98 | 7.804 | 117.96 |
| Ile116 | 7.254 | 120.14 | 7.269 | 120.17 | 7.263 | 120.13 |
| Arg117 | 9.171 | 128.39 | -     | -      | -     | -      |
| Pro118 | -     | -      | -     | -      | -     | -      |
| Ala119 | 8.362 | 122.29 | -     | -      | -     | -      |
| Pro120 | -     | -      | -     | -      | -     | -      |
| Glu121 | 8.591 | 119.51 | -     | -      | 8.606 | 119.51 |
| Phe122 | 7.183 | 116.35 | 7.253 | 116.43 | 7.18  | 116.34 |
| Ala123 | 8.177 | 123.72 | 8.153 | 123.82 | 8.192 | 123.73 |
| Val124 | 8.27  | 116.64 | -     | -      | -     | -      |
| Thr125 | 8.553 | 115.92 | 8.557 | 115.74 | 8.578 | 115.97 |
| Leu126 | 7.19  | 120.45 | 7.227 | 120.38 | 7.188 | 120.24 |
| Ser127 | 7.305 | 113.88 | 7.445 | 114    | 7.318 | 113.84 |
| Thr128 | 8.143 | 116.75 | -     | -      | 8.151 | 116.83 |
| Glu129 | 8.716 | 120.86 | 8.693 | 120.91 | -     | -      |
| Tyr130 | 7.578 | 115.3  | 7.567 | 115.21 | 7.593 | 115.36 |
| Leu131 | -     | -      | -     | -      | -     | -      |
| Thr132 | 8.928 | 115.15 | 8.943 | 115.4  | 8.939 | 115.11 |
| Gly133 | 7.445 | 106.88 | 7.47  | 106.9  | 7.452 | 106.85 |

|        |       |        |       |        |       |        |
|--------|-------|--------|-------|--------|-------|--------|
| Leu134 | -     | -      | -     | -      | -     | -      |
| Gly135 | 9.778 | 112.07 | 9.785 | 112    | 9.802 | 112.12 |
| Ala136 | 8.678 | 128.37 | 8.699 | 128.37 | 8.69  | 128.41 |
| Leu137 | 8.073 | 125.51 | 8.089 | 125.48 | 8.077 | 125.53 |
| Gly138 | 8.604 | 114.76 | 8.612 | 114.66 | 8.614 | 114.76 |
| Asp139 | 8.62  | 125.44 | -     | -      | 8.632 | 125.48 |
| Arg140 | 7.771 | 121.45 | -     | -      | 7.781 | 121.45 |
| Met141 | 8.409 | 124.27 | 8.415 | 124.1  | 8.423 | 124.26 |
| Leu142 | 9.034 | 124.53 | -     | -      | 9.043 | 124.53 |
| Ile143 | 8.41  | 126.71 | 8.444 | 126.76 | 8.444 | 126.75 |
| Leu144 | 8.322 | 128.39 | 8.336 | 128.34 | 8.336 | 128.4  |
| Val145 | 8.319 | 121.72 | -     | -      | -     | -      |
| Asn146 | 9.187 | 124.89 | -     | -      | 9.207 | 124.98 |
| Ile147 | -     | -      | -     | -      | -     | -      |
| Glu148 | 8.314 | 122.83 | -     | -      | -     | -      |
| Lys149 | 7.369 | 117.12 | 7.412 | 116.69 | 7.369 | 117.22 |
| Leu150 | 7.51  | 118.61 | 7.439 | 118.76 | 7.522 | 118.63 |
| Leu151 | 7.695 | 115.67 | 7.719 | 115.5  | 7.724 | 115.72 |
| Asn152 | -     | -      | -     | -      | -     | -      |
| Ser153 | -     | -      | -     | -      | -     | -      |
| Glu154 | 8.594 | 123.9  | -     | -      | -     | -      |
| Glu155 | 8.616 | 119.8  | -     | -      | 8.603 | 119.78 |
| Met156 | 8.139 | 116.99 | -     | -      | 8.152 | 116.98 |
| Ala157 | 7.672 | 120.94 | -     | -      | 7.689 | 121.05 |
| Leu158 | -     | -      | -     | -      | -     | -      |
| Leu159 | 7.88  | 120.18 | -     | -      | 7.929 | 120.44 |

|        |       |        |       |        |       |        |
|--------|-------|--------|-------|--------|-------|--------|
| Asp160 | 8.173 | 119.83 | -     | -      | 8.188 | 119.89 |
| Ser161 | 7.986 | 115.39 | 7.979 | 115.33 | 8.017 | 115.52 |
| Ala162 | 8.016 | 124.76 | -     | -      | 8.045 | 124.83 |
| Ala163 | 7.972 | 119.94 | -     | -      | 7.984 | 119.94 |
| Ser164 | 7.859 | 113.45 | -     | -      | 7.878 | 113.5  |
| Glu165 | 8.086 | 122.14 | -     | -      | 8.106 | 122.18 |
| Val166 | 7.884 | 119.71 | -     | -      | 7.895 | 119.74 |
| Ala167 | -     | -      | -     | -      | -     | -      |

\* mutated residues
