# Supplementary material for: Conformational Coupling between Receptor and Kinase Binding Sites through a Conserved Salt Bridge in a Signaling Complex Scaffold Protein
Source: PubMed Central journal article supplement (PMC3828127; doi:10.1371/journal.pcbi.1003337), 2013-11-14
Supplement: pcbi.1003337.s009.pdf [file pcbi.1003337.s009.pdf]

**Table S4: Differences phenomenological transverse relaxation rate constant  $\Delta R_{ex} = R_{ex}(20ms) - R_{ex}(1ms)$  and  $\Delta\Delta R_{ex}$  the differences between the  $\Delta R_{ex}$  in R62A and Wild type. Residues with large  $\Delta\Delta R_{ex}$  are likely to be involved in motions in the microsecond-to-millisecond time scale (bold).**

| Residues     | $\Delta R_{ex}$ ( $s^{-1}$ ) |              | $\Delta\Delta R_{ex}$ ( $s^{-1}$ )        |
|--------------|------------------------------|--------------|-------------------------------------------|
|              | Wild type                    | R62A         | $\Delta R_{ex}(R62A) - \Delta R_{ex}(WT)$ |
| Thr23        |                              | 2.83         | 2.83                                      |
| Asp26        | 1.9                          | 2.19         | 0.29                                      |
| Glu27        |                              | 1.44         | 1.44                                      |
| Tyr29        | 2.59                         | 2.92         | 0.33                                      |
| Ile31        |                              | 3.32         | 3.32                                      |
| Glu38        | 1.56                         | 4.41         | 2.85                                      |
| Ile39        | 1.57                         | 5.78         | 4.21                                      |
| Arg40        |                              | 4.3          | 4.3                                       |
| Gly41        |                              | 4.91         | 4.91                                      |
| Tyr42        | 2.12                         | 3.03         | 0.91                                      |
| Val45        | 12.87                        | 11.75        | -1.12                                     |
| Ile48        | 2.68                         | 2.9          | 0.22                                      |
| Ala49        | 6.27                         |              | -6.27                                     |
| Asn50        | 6.19                         |              | -6.19                                     |
| Ile55        | 6.09                         |              | -6.09                                     |
| Thr59        | 9.56                         |              | -9.56                                     |
| Gly63        | 8.15                         |              | -8.15                                     |
| <b>Ile65</b> | <b>2.66</b>                  | <b>11.09</b> | <b>8.43</b>                               |
| Val66        | 9.09                         | 16.91        | 7.82                                      |
| Arg72        | 3.79                         | 6.45         | 2.66                                      |
| Ile73        | 3.21                         | 4.44         | 1.23                                      |
| <b>Phe75</b> | <b>8.51</b>                  | <b>13.67</b> | <b>5.16</b>                               |
| <b>Ser76</b> | <b>3.26</b>                  | <b>12.08</b> | <b>8.82</b>                               |
| <b>Gln77</b> | <b>2.57</b>                  | <b>8.95</b>  | <b>6.38</b>                               |
| Val78        | 7.09                         | 8.84         | 1.75                                      |

|        |       |       |        |
|--------|-------|-------|--------|
| Asp79  | 2.32  | 3.09  | 0.77   |
| Asp81  | 8.83  |       | -8.83  |
| Asn83  | 1.83  | 4.69  | 2.86   |
| Asn85  | 1.19  | 2.08  | 0.89   |
| Thr86  | 5.33  | 16.87 | 11.54  |
| Val88  | 5.89  |       | -5.89  |
| Gly94  | 6.08  |       | -6.08  |
| Gln95  | 5.75  | 7.74  | 1.99   |
| Val97  | 4.55  | 6.01  | 1.46   |
| Val98  | 2.78  | 3.91  | 1.13   |
| Gly99  | 2.78  | 7.84  | 5.06   |
| Ile100 | 9.31  |       | -9.31  |
| Ser106 | 1.53  | 2.55  | 1.02   |
| Asp107 | 1.54  | 0.7   | -0.84  |
| Val108 | 0.67  | 0.56  | -0.11  |
| Leu111 | 4.23  | 3.55  | -0.68  |
| Glu114 | 1.31  | 1.39  | 0.08   |
| Ala119 | 1.74  |       | -1.74  |
| Glu121 | 5.14  | 5.47  | 0.33   |
| Phe122 | 3.38  | 4.4   | 1.02   |
| Ala123 | 3.83  | 3.58  | -0.25  |
| Thr125 | 6.68  |       | -6.68  |
| Glu129 | 4.59  | 5.04  | 0.45   |
| Tyr130 | 10.35 |       | -10.35 |
| Ala136 | 6.09  | 6.68  | 0.59   |
| Ala136 |       | 4.92  | 4.92   |
| Arg140 | 1.7   | 1.73  | 0.03   |
| Met141 |       | 0.59  | 0.59   |
| Leu142 | 2.13  |       | -2.13  |

|               |             |              |             |
|---------------|-------------|--------------|-------------|
| Val145        | 4.94        |              | -4.94       |
| Asn146        | 5.34        | 6.34         | 1           |
| Lys149        | 10.54       | 14.8         | 4.26        |
| Leu150        | 8.1         | 6.96         | -1.14       |
| Leu151        |             | 3.51         | 3.51        |
| Glu155        | 9.65        | 6.82         | -2.83       |
| Ala157        | 9.21        |              | -9.21       |
| <b>Leu159</b> | <b>5.35</b> | <b>13.13</b> | <b>7.78</b> |
| Asp160        | 7.65        | 12.46        | 4.81        |
| Ser161        | 9.02        | 11.08        | 2.06        |
| Ala162        | 2.89        | 5.62         | 2.73        |
| <b>Ser164</b> | <b>6.8</b>  | <b>15.94</b> | <b>9.14</b> |
| Glu165        | 1.07        | 3.29         | 2.22        |
| Val166        | 6.17        | 13.27        | 7.1         |
